# Supplementary material
Source: publisher figshare collection journal article supplement (https://sage.figshare.com/ndownloader/files/14453489)
Supplement: Supplementary file 1 [file 14453489]

## Supplemental Appendix 1

| Authors                 | Location  | Name of Intervention                  | Target group               | Type of intervention                                  | Sport              | Behavior targeted                    | Layer(s)           | Level                                       | Design                             |
|-------------------------|-----------|---------------------------------------|----------------------------|-------------------------------------------------------|--------------------|--------------------------------------|--------------------|---------------------------------------------|------------------------------------|
| Abbott et al., 2008     | Australia | <i>SafeClub</i>                       | Sports participants        | Risk management education program                     | Soccer             | Safety issues                        | Macro, meso        | Institutional                               | Controlled pre- and post-survey    |
| Anderson & Pierce, 2012 | Australia | <i>Mental health first aid (MHFA)</i> | Young rural males          | Mental health literacy training                       | Football, netball  | Mental health, first aid             | Meso, macro        | Interpersonal                               | Pre- and post-survey + focus group |
| Barnes et al., 2010     | Canada    | -                                     | Sport clubs                | Partnership program                                   | Cycling            | Healthy eating, PA, smoking          | Macro              | Community                                   | Network analysis                   |
| Bruun et al., 2014      | Denmark   | <i>Fodbold Fitness</i>                | Prostate cancer survivors  | Community based recreational program                  | Soccer             | PA and quality of life               | Micro, meso, macro | Intrapersonal, interpersonal, institutional | Process evaluation                 |
| Buchholz et al., 2008   | Canada    | <i>BodySense</i>                      | Female athletes            | Prevention program                                    | Gymnastics         | Positive body image, eating behavior | Micro, meso        | Intrapersonal, interpersonal                | Randomized controlled trial        |
| Casey et al., 2014      | Australia | <i>Game Sense Approach</i>            | Adolescent girls           | School-sports clubs link                              | Tennis or football | Health promotion                     | Macro              | Intrapersonal, interpersonal, institutional | Process evaluation                 |
| Casey et al., 2012      | Australia | <i>Partnership for Health (PfH)</i>   | Sports participants        | System wide health promotion program                  |                    | Health promotion                     | Macro, meso        | Institutional, policy                       | Survey                             |
| Casey et al., 2009a     | Australia | -                                     | Regional sports assemblies | Organizational change, capacity building intervention |                    | Health promotion                     | Macro              | Community                                   | Survey and interviews              |
| Casey et al., 2009b     | Australia | -                                     | Sports clubs               | Partnership development                               |                    | Health promotion                     | Macro              | Community                                   | Case study                         |

|                         |              |                                         |                                  |                                                  |                     |                                                                                    |                    |                                                        |                                 |
|-------------------------|--------------|-----------------------------------------|----------------------------------|--------------------------------------------------|---------------------|------------------------------------------------------------------------------------|--------------------|--------------------------------------------------------|---------------------------------|
| Cleary et al., 2012     | USA          | -                                       | Elite athletes                   | Behavior education                               | Volleyball          | Hydration                                                                          | Micro              | Intrapersonal                                          | Cross-over trial                |
| Corti et al., 1995      | Australia    | <i>Healthway</i>                        | Sports clubs                     | Sponsorship program                              |                     | Health promotion                                                                   | Macro              | Institutional                                          | Descriptive survey              |
| Crisp & Swerissen, 2003 | Australia    | -                                       | Sports participants              | Structural changes in setting                    |                     | Smoking, alcohol consumption, healthy eating, sun protection                       | Macro              | Institutional                                          | Case study                      |
| Darker et al., 2013     | Ireland      | -                                       | Amateur sportsmen                | Community, mobilization multi-level intervention | Gaelic football     | Alcohol consumption                                                                | Micro, meso, macro | Intrapersonal, interpersonal, institutional, community | Qualitative study               |
| DeBate et al., 2009     | USA          | <i>Girls on the run, Girls on track</i> | Adolescent girls                 | Sport and PA Development                         | Running             | PA, body image, self-esteem                                                        | Micro              | Intrapersonal                                          | Pre- and post-survey            |
| Dobbinson et al., 2006  | Australia    | -                                       | Sports participants              | Policies and sponsorship development             | Multiple sports     | Smoke free, sun protection, healthy eating, injury prevention, alcohol consumption | Macro              | Institutional                                          | Descriptive study               |
| Eagles et al., 2016     | Canada       | <i>Concussion-U</i>                     | Sports participants              | Education program                                | Hockey              | Concussion                                                                         | Micro              | Intrapersonal, interpersonal                           | Pre- and post-survey            |
| Edwards & Edwards, 2012 | South Africa | -                                       | Sports participants              | Psychological skills training                    | Rugby               | Health and performance                                                             | Micro              | Intrapersonal                                          | Pre- and post-survey            |
| Falcão et al., 2012     | Canada       | -                                       | Youth sport coaches and athletes | Program youth development                        | Soccer, basket ball | Youth developmental outcomes                                                       | Micro              | Interpersonal                                          | Qualitative pre- and post-study |

|                          |                 |                                 |                                |                                           |                       |                                       |             |                                                        |                             |
|--------------------------|-----------------|---------------------------------|--------------------------------|-------------------------------------------|-----------------------|---------------------------------------|-------------|--------------------------------------------------------|-----------------------------|
| Geidne et al., 2013      | Sweden          | <i>Goal without alcohol</i>     | Sports participants            | Policies implementation                   | Soccer                | Alcohol consumption                   | Macro       | Intrapersonal, interpersonal, institutional, community | Case study                  |
| Gianotti et al., 2010    | New Zealand     | <i>NetballSmart SoccerSmart</i> | Sports participants            | Injury prevention coach education         | Netball, soccer       | Injury prevention                     | Micro       | Interpersonal                                          | Survey                      |
| Giles-Corti et al., 2001 | Australia       | <i>Healthway</i>                | Sports club setting            | Health sponsorship                        |                       | Smoking, passive smoking              | Macro       | Institutional                                          | Survey                      |
| Haudenhuyse et al., 2012 | Belgium         | <i>Opboxen</i>                  | Vulnerable youth               | Sport based intervention                  | Boxing                | Sport participation, social inclusion | Micro       | Intrapersonal                                          | Descriptive study           |
| Hermens et al., 2017     | The Netherlands | <i>Youth, Care and Sport</i>    | Socially vulnerable youth      | Networking                                | Multiple sports       | Social inclusion                      | Macro       | Community                                              | Descriptive study           |
| Hilland et al., 2015     | England         | <i>Roy Castle FagEnd</i>        | Sport coaches and participants | Coach education and communication program | Multiple sports       | Smoking                               | Micro       | Interpersonal                                          | Process evaluation          |
| Inoue et al., 2015       | USA             | <i>Family Fitness Challenge</i> | Families                       | Family centered HP initiative             | Professional NBA team | Health promotion                      | Micro       | Intrapersonal, interpersonal                           | Qualitative study           |
| Kaplan et al., 2015      | Haiti           | <i>GenNext</i>                  | Adolescent girls               | Soccer-education program                  | Soccer                | Pregnancy                             | Micro       | Intrapersonal, interpersonal, institutional, community | Pre- and post-survey        |
| Kingsland et al., 2015   | Australia       | <i>Good sports program</i>      | Sports participants            | Accreditation program                     | Australian football   | Health promotion                      | Macro, meso | Institutional                                          | Randomized controlled trial |

|                                |                           |                                             |                                                 |                                      |                                               |                                   |                    |                                            |                                  |
|--------------------------------|---------------------------|---------------------------------------------|-------------------------------------------------|--------------------------------------|-----------------------------------------------|-----------------------------------|--------------------|--------------------------------------------|----------------------------------|
| Lackinger et al., 2015         | Australia                 | <i>TGSEC</i>                                | Diabetes patient                                | PA training                          | Circuit training                              | PA, quality of life               | Micro              | Intrapersonal                              | Pre- and post-survey             |
| Lane et al., 2017              | Ireland                   | <i>GAA healthy club project</i>             | Sport participants                              | Setting based health promotion       | Gaelic football                               | Health promotion                  | Macro              | All                                        | Survey                           |
| Larsen et al., 2015            | Norway and France         | <i>Empowering coaching training program</i> | Youth football players                          | Coach education program              | Soccer                                        | Sports engagement                 | Micro              | Interpersonal                              | Qualitative study                |
| Litvak-Hirsch et al., 2016     | Israel                    | <i>Mifalot's 'United Soccer for Peace'</i>  | Arab and Jewish coaches and sports participants | Coach education and funding leverage | Soccer                                        | Coaches skills, peace values      | Micro              | Intrapersonal, interpersonal               | Qualitative study                |
| Lozano-Sufrategui et al., 2017 | Great Britain             | <i>Healthy stadia</i>                       | Older overweight men                            | Weight management programmes         | Physical activity, circuit training, football | Overweight, obesity               | Micro              | Intrapersonal                              | Qualitative study                |
| Mandelbaum et al., 2005        | USA                       | -                                           | Female youth soccer                             | Injury prevention specific training  | Soccer                                        | Anterior cruciate ligament injury | Micro              | Intrapersonal, interpersonal               | Prospective non randomized trial |
| Marlier et al., 2014           | Belgium                   | <i>Community sport program</i>              | Individuals at risk of sport deprivation        | Community capacity building          |                                               | Health through sport              | Macro              | Community                                  | Case study                       |
| Marlier et al., 2014           | Belgium                   | <i>Community sport program</i>              | Low SES adults                                  | Community capacity building          | Multi-sports                                  | Sports participation              | Micro, meso, macro | Intrapersonal, institutional and community | Qualitative study                |
| McConkey et al., 2013          | Germany, Hungary, Poland, | <i>Youth Unified</i>                        | Participants with                               | Youth sports program                 | Football, basketball                          | Social inclusion                  | Macro, meso        | Intrapersonal                              | Descriptive study                |

|                          |                 |                                                           |                                                   |                                           |                 |                                           |                    |                                                        |                             |
|--------------------------|-----------------|-----------------------------------------------------------|---------------------------------------------------|-------------------------------------------|-----------------|-------------------------------------------|--------------------|--------------------------------------------------------|-----------------------------|
|                          | Serbia, Ukraine | <i>Sports Programme</i>                                   | intellectual disabilities                         |                                           |                 |                                           |                    |                                                        |                             |
| McElroy et al., 2008     | Great Britain   | <i>Care Standards Improvement Programme (CSIP) league</i> | Male                                              | Care standards Improvement program        | Soccer          | Mental health                             | Micro              | Intrapersonal, community                               | Descriptive study           |
| Misener & Misener, 2016  | Canada          | <i>Active city</i>                                        | Sport participants                                | Partnership development                   |                 | Sport participation                       | Macro              | Community                                              | Case study                  |
| Morgan et al., 2017      | Great Britain   | <i>X-PERT</i>                                             | Type 2 diabetes patients                          | Education program                         | Soccer          | Diabetes empowerment, PA, medication      | Micro              | Intrapersonal                                          | Pre- and post-survey        |
| O'farrell et al., 2017   | Ireland         | -                                                         | Amateur sportsmen                                 | Multifaceted community based intervention | Gaelic Football | Alcohol consumption, alcohol-related harm | Micro, meso, macro | Intrapersonal, interpersonal, institutional, community | Descriptive study           |
| O'Gorman et al., 2015    | England         | -                                                         | Ethnic groups                                     | Policy implementation                     | Soccer          | Social inequalities                       | Macro              | Institutional                                          | Descriptive study           |
| Parrott et al., 1999     | USA             | -                                                         | Children                                          | Health education                          | Soccer          | Sun protection                            | Micro              | Interpersonal                                          | Randomized controlled trial |
| Poulos & Donaldson, 2015 | Australia       | <i>Mayday Safety Procedure</i>                            | Sports participants                               | Diffusion of procedure                    | Rugby           | Safety                                    | Micro, meso        | Intrapersonal, interpersonal, institutional            | Quasi experimental design   |
| Pringle et al., 2013     | Great Britain   | <i>Premier League Health (PLH)</i>                        | fUnemployed and homeless men, including black and | Soccer based health intervention          | Soccer          | PA, healthy eating, alcohol, smoking      | Micro              | Intrapersonal                                          | Qualitative study           |

|                       |             |                                 |                                               |                                                               |                              |                                           |                    |                          |                                   |
|-----------------------|-------------|---------------------------------|-----------------------------------------------|---------------------------------------------------------------|------------------------------|-------------------------------------------|--------------------|--------------------------|-----------------------------------|
|                       |             |                                 | ethnic minority                               |                                                               |                              |                                           |                    |                          |                                   |
| Reilly et al., 2011   | Australia   | -                               | Aboriginal people                             | Community program                                             | Football netball             | Nutrition, physical activity              | Micro, meso, macro | All                      | Descriptive study                 |
| Rosso & McGrath, 2016 | Australia   | <i>Fun</i>                      | Disadvantaged, migrants, refugees             | Community development program                                 | Soccer                       | Social inclusion, empowerment             | Macro              | Intrapersonal            | Descriptive study                 |
| Rowland et al., 2014  | Australia   | -                               | Sports participants                           | Community program                                             |                              | Alcohol consumption, safe driving         | Micro              | Institutional            | Quasi randomized controlled trial |
| Rowland et al., 2012a | Australia   | <i>Good Sports program</i>      | Adults in sports club                         | Multiple strategy accreditation program                       | Australian football          | Alcohol consumption                       | Meso, macro        | institutional            | Survey                            |
| Rowland et al., 2012b | Australia   | <i>Good Sports program</i>      | Sports participants                           | Setting based program                                         | Football, cricket            | Health promotion                          | Macro, meso        | Institutional            | Descriptive study                 |
| Rowland et al., 2012c | Australia   | <i>Good sports program</i>      | Sports participants                           | Accreditation program                                         | Australian football, cricket | Alcohol harm reduction and safe transport | Macro, meso        | Institutional            | Survey                            |
| Rowland et al., 2012d | Australia   | <i>Good Sports Program</i>      | Sports participants                           | Accreditation program                                         | Football, cricket            | Alcohol consumption                       | Macro, meso        | Institutional            | Survey                            |
| Spittle et al., 2008  | Australia   | <i>Out of school Hours care</i> | Sports participants                           | Partnership development                                       | Multiple sports              | PA and sport participation                | Macro              | Intrapersonal, community | Survey                            |
| Stamm et al., 2001    | Switzerland | <i>Allez Hop!</i>               | Inactive, new participants, middle-aged women | Campaign, intervention, PA behavior, "Sport for all" campaign | Multi-individual sports      | Physical activity                         | Micro              | Intrapersonal            | Qualitative study                 |

|                           |           |                                 |                        |                                                     |                     |                                   |             |                                             |                           |
|---------------------------|-----------|---------------------------------|------------------------|-----------------------------------------------------|---------------------|-----------------------------------|-------------|---------------------------------------------|---------------------------|
| Tighe & McKay, 2012       | Australia | <i>Alive and Kicking Goals!</i> | Indigenous young males | Suicide prevention peer-education program           | Australian football | Suicide prevention, mental health | Micro       | Intrapersonal                               | Qualitative study         |
| Turk et al., 2013         | Tonga     | <i>The ASOP Tonga project</i>   | Women                  | Community program                                   | Netball             | PA and health                     | Macro       | Community                                   | Qualitative study         |
| Van Ryswyk et al., 2017   | Australia | -                               | Elite youth athletes   | Sleep optimization                                  | Australian football | Sleep                             | Micro       | Intrapersonal                               | Pre- and post-survey      |
| Warner–Smith et al., 2000 | Australia | -                               | Sports participants    | Responsible and safe drinking                       | Rugby               | Alcohol consumption               | Macro       | Institutional                               | Process evaluation        |
| Wolfenden et al., 2015    | Australia | -                               | Sports participants    | Availability and cost reduction for health behavior | Rugby, football     | Nutrition                         | Macro, meso | Intrapersonal, interpersonal, institutional | Quasi experimental design |

- Abbott, K., Klarenaar, P., Donaldson, A., & Sherker, S. (2008). Evaluating SafeClub: can risk management training improve the safety activities of community soccer clubs? *Br J Sports Med*, 42(6), 460-465.
- Anderson, R. J., & Pierce, D. (2012). Assumptions associated with mental health literacy training—Insights from initiatives in rural Australia. *Advances in Mental Health*, 10(3), 258-267.
- Barnes, M., MacLean, J., & Cousens, L. (2010). Understanding the structure of community collaboration: the case of one Canadian health promotion network. *Health Promot Int*, 25(2), 238-247.
- Bruun, D. M., Bjerre, E., Krustup, P., Brasso, K., Johansen, C., Rørth, M., & Midtgaard, J. (2014). Community-based recreational football: a novel approach to promote physical activity and quality of life in prostate cancer survivors. *Int J Environ Res Public Health*, 11(6), 5567-5585.
- Buchholz, A., Mack, H., McVey, G., Feder, S., & Barrowman, N. (2008). BodySense: An evaluation of a positive body image intervention on sport climate for female athletes. *Eating Disorders*, 16(4), 308-321.
- Casey, M., Harvey, J., Eime, R., & Payne, W. (2012). Examining changes in the organisational capacity and sport-related health promotion policies and practices of State Sporting Organizations. *Annals of Leisure Research*, 15(3), 261-276.
- Casey, M. M., Payne, W. R., Brown, S. J., & Eime, R. M. (2009b). Engaging community sport and recreation organisations in population health interventions: Factors affecting the formation, implementation, and institutionalisation of partnerships efforts. *Annals of Leisure Research*, 12(2), 129-147.
- Casey, M. M., Payne, W. R., & Eime, R. M. (2009a). Building the health promotion capacity of sport and recreation organisations: A case study of Regional Sports Assemblies. *Managing Leisure*, 14(2), 112-124.
- Casey, M. M., Telford, A., Mooney, A., Harvey, J. T., Eime, R. M., & Payne, W. R. (2014). Linking secondary school physical education with community sport and recreation for girls: a process evaluation. *BMC Public Health*, 14(1), 1039.
- Cleary, M. A., Hetzler, R. K., Wasson, D., Wages, J. J., Stickley, C., & Kimura, I. F. (2012). Hydration behaviors before and after an educational and prescribed hydration intervention in adolescent athletes. *J Athl Train*, 47(3), 273-281.
- Corti, B., J. HOLMAN, C. D. A., Donovan, R. J., Frizzell, S. K., & Carroll, A. M. (1995). Using sponsorship to create healthy environments for sport, racing and arts venues in Western Australia. *Health Promot Int*, 10(3), 185-197.
- Crisp, B. R., & Swerissen, H. (2003). Critical processes for creating health-promoting sporting environments in Australia. *Health Promot Int*, 18(2), 145-152.
- Darker, C. D., Ivers, J.-H., O'Farrell, A., Dolan, R., Eldin, N., & Allwright, S. (2013). A qualitative study of the perceived impact of a community mobilisation intervention to reduce alcohol consumption among amateur sportsmen. *Irish Journal of Psychological Medicine*, 30(1), 57-66.
- DeBate, R. D., Pettee Gabriel, K., Zwald, M., Huberty, J., & Zhang, Y. (2009). Changes in psychosocial factors and physical activity frequency among third-to eighth-grade girls who participated in a developmentally focused youth sport program: A preliminary study. *Journal of School Health*, 79(10), 474-484.
- Dobbinson, S. J., Hayman, J. A., & Livingston, P. M. (2006). Prevalence of health promotion policies in sports clubs in Victoria, Australia. *Health promotion international*, 21(2), 121-129. doi:10.1093/heapro/dak001
- Eagles, M. E., Bradbury-Squires, D. J., Powell, M. F., Murphy, J. R., Campbell, G. D., & Maroun, F. B. (2016). The impact of a Concussion-U educational program on knowledge of and attitudes about concussion. *Canadian journal of neurological sciences*, 43(5), 659-664.
- Edwards, D. J., & Edwards, S. D. (2012). The evaluation of a psychological skills training programme for rugby players: sport science. *African Journal for Physical Health Education, Recreation and Dance*, 18(3), 525-534.



- Falcão, W. R., Bloom, G. A., & Gilbert, W. D. (2012). Coaches' perceptions of a coach training program designed to promote youth developmental outcomes. *Journal of Applied Sport Psychology, 24*(4), 429-444.
- Geidne, S., Quennerstedt, M., & Eriksson, C. (2013). The implementation process of alcohol policies in eight Swedish football clubs. *Health Education, 113*(3), 196-215.  
doi:10.1108/09654281311309837
- Gianotti, S., Hume, P. A., & Tunstall, H. (2010). Efficacy of injury prevention related coach education within netball and soccer. *Journal of Science and Medicine in Sport, 13*(1), 32-35.
- Giles-Corti, B., Clarkson, J. P., Donovan, R. J., Frizzell, S. K., Carroll, A. M., Pikora, T., & Jalleh, G. (2001). Creating smoke-free environments in recreational settings. *Health Education & Behavior, 28*(3), 341-351.
- Haudenhuyse, R. P., Theeboom, M., & Coalter, F. (2012). The potential of sports-based social interventions for vulnerable youth: Implications for sport coaches and youth workers. *Journal of Youth Studies, 15*(4), 437-454.
- Hermens, N., Langen, L., Verkooijen, K. T., & Koelen, M. A. (2017). Co-ordinated action between youth-care and sports: facilitators and barriers. *Health Soc Care Community, 25*(4), 1318-1327.
- Hilland, T. A., Beynon, C. M., McGee, C. E., Murphy, R. C., Parnell, D., Romeo-Velilla, M., . . . Fowweather, L. (2015). Training sports coaches to tackle tobacco: formative evaluation of the SmokeFree Sports campaign. *International Journal of Health Promotion and Education, 53*(1), 2-16.
- Inoue, Y., Yli-Piipari, S., Layne, T., Chambliss, H. O., & Irwin, C. C. (2015). A preliminary study of a professional sport organization's family-centered health promotion initiative. *International Review on Public and Nonprofit Marketing, 12*(2), 189-205.
- Kaplan, K. C., Lewis, J., Gebrian, B., & Theall, K. (2015). Soccer and sexual health education: a promising approach for reducing adolescent births in Haiti. *Revista Panamericana de Salud Pública, 37*(4-5), 316-323.
- Kingsland, M., Wolfenden, L., Tindall, J., Rowland, B., Sidey, M., McElduff, P., & Wiggers, J. H. (2015). Improving the implementation of responsible alcohol management practices by community sporting clubs: A randomised controlled trial. *Drug and alcohol review, 34*(4), 447-457.
- Lackinger, C., Haider, S., Kosi, L., Harreiter, J., Winhofer, Y., & Kautzky-Willer, A. (2015). Potential of a Sports Club-Based Exercise Program for Improving Physical Activity in Type 2 Diabetes Mellitus. *Journal of Physical Activity and Health, 12*(9), 1221-1228.
- Lane, A., Murphy, N., Donohoe, A., & Regan, C. (2017). Health promotion orientation of GAA sports clubs in Ireland. *Sport in Society, 20*(2), 235-243.
- Larsen, T., Van Hoya, A., Tjomsland, H. E., Holsen, I., Wold, B., Heuzé, J.-P., . . . Sarrazin, P. (2015). Creating a supportive environment among youth football players: A qualitative study of French and Norwegian youth grassroots football coaches. *Health Education, 115*(6), 570-586.
- Litvak-Hirsch, T., Galily, Y., & Leitner, M. (2016). Evaluating conflict mitigation and health improvement through soccer: a two-year study of Mifalot's 'United Soccer for Peace' programme. *Soccer & Society, 17*(2), 209-224.
- Lozano-Sufrategui, L., Pringle, A., Carless, D., & McKenna, J. (2017). 'It brings the lads together': a critical exploration of older men's experiences of a weight management programme delivered through a Healthy Stadia project. *Sport in Society, 20*(2), 303-315.
- Mandelbaum, B. R., Silvers, H. J., Watanabe, D. S., Knarr, J. F., Thomas, S. D., Griffin, L. Y., . . . Garrett Jr, W. (2005). Effectiveness of a neuromuscular and proprioceptive training program in preventing anterior cruciate ligament injuries in female athletes: 2-year follow-up. *Am J Sports Med, 33*(7), 1003-1010.
- Marlier, M., Cardon, G., De Bourdeaudhuij, I., & Willem, A. (2014). A capacity building approach to increase sports participation in disadvantaged urban communities: A multilevel analysis. *Journal of Urban Health, 91*(6), 1114-1128.

- McConkey, R., Dowling, S., Hassan, D., & Menke, S. (2013). Promoting social inclusion through unified sports for youth with intellectual disabilities: a five-nation study. *Journal of intellectual disability research, 57*(10), 923-935.
- McElroy, P., Evans, P., & Pringle, A. (2008). Sick as a parrot or over the moon: an evaluation of the impact of playing regular matches in a football league on mental health service users. *Practice development in health care, 7*(1), 40-48.
- Misener, L., & Misener, K. E. (2016). Examining the integration of sport and health promotion: partnership or paradox? *International Journal of Sport Policy and Politics, 8*(4), 695-712. doi:10.1080/19406940.2016.1220405
- Morgan, A., Drew, D., Clifford, A., & Hull, K. (2017). Success of a sports-club led-community X-PERT Diabetes Education Programme. *Sport in Society, 20*(2), 269-280.
- O'farrell, A., Kingsland, M., Kenny, S., Eldin, N., Wiggers, J., Wolfenden, L., & Allwright, S. (2017). A multi-faceted intervention to reduce alcohol misuse and harm amongst sports people in Ireland: A controlled trial. *Drug and alcohol review.*
- O'Gorman, J., Coopoo, Y., & Fortuin, C. (2015). The implementation of a football development policy in England: implications for South Africa: sport management and governance. *African Journal for Physical Health Education, Recreation and Dance, 21*(Supplement 1), 142-159.
- Parrott, R., Duggan, A., Cremo, J., Eckles, A., Jones, K., & Steiner, C. (1999). Communicating about youth's sun exposure risk to soccer coaches and parents: a pilot study in Georgia. *Health Education & Behavior, 26*(3), 385-395.
- Poulos, R. G., & Donaldson, A. (2015). Improving the diffusion of safety initiatives in community sport. *Journal of Science and Medicine in Sport, 18*(2), 139-144.
- Pringle, A., Zwolinsky, S., McKenna, J., Daly-Smith, A., Robertson, S., & White, A. (2013). Delivering men's health interventions in English Premier League football clubs: key design characteristics. *Public Health, 127*(8), 716-726.
- Reilly, R. E., Cincotta, M., Doyle, J., Firebrace, B. R., Cargo, M., Van den Tol, G., . . . Rowley, K. G. (2011). A pilot study of Aboriginal health promotion from an ecological perspective. *BMC Public Health, 11*(1), 749.
- Rosso, E., & McGrath, R. (2016). Promoting physical activity among children and youth in disadvantaged South Australian CALD communities through alternative community sport opportunities. *Health Promotion Journal of Australia, 27*(2), 105-110.
- Rowland, B., Allen, F., & Toumbourou, J. W. (2012a). Association of risky alcohol consumption and accreditation in the 'Good Sports' alcohol management programme. *J Epidemiol Community Health, 66*(8), 684-690.
- Rowland, B., Allen, F., & Toumbourou, J. W. (2012b). Impact of alcohol harm reduction strategies in community sports clubs: pilot evaluation of the Good Sports program. *Health psychology, 31*(3), 323.
- Rowland, B., Toumbourou, J., & Allen, F. (2012c). Drink-driving in community sports clubs: adopting the good sports alcohol management program. *Accident Analysis & Prevention, 48*, 264-270.
- Rowland, B., Toumbourou, J. W., & Allen, F. (2012d). Reducing alcohol-impaired driving in community sports clubs: evaluating the good sports program. *J Stud Alcohol Drugs, 73*(2), 316-327.
- Rowland, B. C., Wolfenden, L., Dodds, P., Kingsland, M., Gillham, K. E., & Wiggers, J. H. (2014). The impact of a hypothetical designated driver program on intended alcohol-related behavior: an RCT. *Health Promot Int, 30*(1), 7-15.
- Spittle, M., O'Meara, J., Garnham, J., & Kerr, M. (2008). Providing sporting experiences for children in Out of School Hours Care (OSHC) environments: Sport and physical activity participation and intentions. *Journal of Science and Medicine in Sport, 11*(3), 316-322.
- Stamm, H., Lamprecht, M., Somaini, B., & Peters, M. (2001). "Getting Switzerland to move": E valuation of a new "Sport for All" programme. *Sozial-und Präventivmedizin, 46*(1), 20-28.
- Tighe, J., & McKay, K. (2012). Alive and kicking goals!: preliminary findings from a Kimberley suicide prevention program. *Advances in Mental Health, 10*(3), 240-245.

- Turk, T., Latu, N., Cocker-Palu, E., Liavaa, V., Vivili, P., Gloede, S., & Simons, A. (2013). Using rapid assessment and response to operationalise physical activity strategic health communication campaigns in Tonga. *Health Promotion Journal of Australia, 24*(1), 13-19.
- Van Ryswyk, E., Weeks, R., Bandick, L., O'Keefe, M., Vakulin, A., Catcheside, P., . . . Wallace, J. (2017). A novel sleep optimisation programme to improve athletes' well-being and performance. *Eur J Sport Sci, 17*(2), 144-151.
- Warner-Smith, M., Wiggers, J., Considine, R., & Knight, J. (2000). Dissemination of responsible service of alcohol initiatives to rugby league clubs. *Aust N Z J Public Health, 24*(3), 312-315.
- Wolfenden, L., Kingsland, M., Rowland, B. C., Dodds, P., Gillham, K., Yoong, S. L., . . . Wiggers, J. (2015). Improving availability, promotion and purchase of fruit and vegetable and non sugar-sweetened drink products at community sporting clubs: a randomised trial. *International Journal of Behavioral Nutrition and Physical Activity, 12*(1), 35.
